# Supplementary material for: The taxonomy of the model filamentous fungus Podospora anserina
Source: MycoKeys. 2020 Nov 25;75:51–69. doi: 10.3897/mycokeys.75.55968 (PMC7710671; doi:10.3897/mycokeys.75.55968)
Supplement: Supplementary material 5 — Table S2 [file mycokeys-75-051-s005.xls]

## Sheet: SupTable2
Alignment	No. Taxa	length	Variable sites	Parsimony informative
Concatenated (ITS+LSU+Btub+rbp2)	107	5895	2110	1654
Concatenated (ITS+LSU+Btub)	106	4094	1285	1009
Concatenated (ITS+LSU)	106	2194	458	324
Btub1	38	821	496	421
Btub2	49	1079	323	259
ITS	81	809	269	199
LSU	102	1385	187	125
RPB2	60	1801	825	645
